# Supplementary material
Source: PubMed Central journal article supplement (PMC9943719)
Supplement: mmc4.pdf [file mmc4.pdf]

# Challenges of accurately estimating sex-biased admixture from X chromosomal and autosomal ancestry proportions

## Authors

Aaron Pfennig, Joseph Lachance

## Correspondence

[joseph.lachance@biology.gatech.edu](mailto:joseph.lachance@biology.gatech.edu)

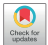

Pfennig & Lachance, 2023, *The American Journal of Human Genetics* 110, 359–367

February 2, 2023 © 2022 American Society of Human Genetics.  
<https://doi.org/10.1016/j.ajhg.2022.12.012>

# Challenges of accurately estimating sex-biased admixture from X chromosomal and autosomal ancestry proportions

Aaron Pfennig<sup>1</sup> and Joseph Lachance<sup>1,\*</sup>

## Summary

Sex-biased admixture can be inferred from ancestry-specific proportions of X chromosome and autosomes. In a paper published in the *American Journal of Human Genetics*, Micheletti et al.<sup>1</sup> used this approach to quantify male and female contributions following the transatlantic slave trade. Using a large dataset from 23andMe, they concluded that African and European contributions to gene pools in the Americas were much more sex biased than previously thought. We show that the reported extreme sex-specific contributions can be attributed to unassigned genetic ancestry as well as the limitations of simple models of sex-biased admixture. Unassigned ancestry proportions in the study by Micheletti et al. ranged from ~1% to 21%, depending on the type of chromosome and geographic region. A sensitivity analysis illustrates how this unassigned ancestry can create false patterns of sex bias and that mathematical models are highly sensitive to slight sampling errors when inferring mean ancestry proportions, making confidence intervals necessary. Thus, unassigned ancestry and the sensitivity of the models effectively prohibit the interpretation of estimated sex biases for many geographic regions in Micheletti et al. Furthermore, Micheletti et al. assumed models of a single admixture event. Using simulations, we find that violations of demographic assumptions, such as subsequent gene flow and/or sex-specific assortative mating, may have confounded the analyses of Micheletti et al., but unassigned ancestry was likely the more important confounding factor. Our findings underscore the importance of using complete ancestry information, sufficiently large sample sizes, and appropriate models when inferring sex-biased patterns of demography. This Matters Arising paper is in response to Micheletti et al.,<sup>1</sup> published in *American Journal of Human Genetics*. See also the response by Micheletti et al.,<sup>2</sup> published in this issue.

## Introduction

In the paper “Genetic consequences of the transatlantic slave trade in the Americas,” Micheletti et al. conducted an ambitious study that integrated genetic evidence of admixture in the Americas with historic documents of the transatlantic slave trade to the Americas.<sup>1</sup> A central component of their study was to estimate sex-biased contributions of Africans, Europeans, and Native Americans to the gene pools of contemporary populations in the Americas. Using ancestry proportions from X chromosomes and autosomes, Micheletti et al. inferred sex biases that are consistent with the directionality established by previous studies (e.g., female-biased African contributions and male-biased European contributions).<sup>1</sup> However, the reported ratios of female and male contributions were markedly larger than previous estimates.<sup>3–9</sup> For example, they reported that African women contributed approximately 15 times as much as African men to the gene pool in Central America, and European men contributed approximately 71 times as much as European women to the gene pool in Cabo Verde (Table 1 in Micheletti et al.).<sup>1</sup> Importantly, these unusually large numbers were directly repeated by various news outlets.<sup>10–12</sup> Although there is no question that sex-biased admixture occurred, we find that the extreme sex ratios reported by Micheletti et al. are questionable.

There are three major reasons to question their claims of such strong sex-biased admixture in the Americas. First, inconsistencies in the results, which we describe below, suggest that Micheletti et al. may have improperly implemented a population genetics model for estimating sex biases of a recent single admixture event, leading to miscalculations of sex bias. Second, some geographic regions have substantial amounts of unassigned genetic ancestry in the study by Micheletti et al. As will be shown below, this unassigned ancestry can create false patterns of sex-biased admixture. Third, the applied models assume a single admixture event followed by random mating with no subsequent population growth or gene flow. However, admixture in the Americas was more complex than a single pulse admixture event,<sup>13–19</sup> and violations of these simplifying assumptions may have confounded the analyses of Micheletti et al.<sup>1</sup>

Here, we set out to identify which of the above three issues most likely confounded the analyses of Micheletti et al.<sup>1</sup> Using the model by Goldberg and Rosenberg,<sup>8</sup> we re-estimated sex ratios from X chromosomal and autosomal ancestry proportions reported by Micheletti et al.<sup>1</sup> As we still observed unexpectedly large sex ratios and cases of model failure (i.e., negative sex ratios), we systematically explored the consequences of unassigned ancestry, model sensitivity, small sample sizes, and violations of simplifying demographic assumptions on

<sup>1</sup>School of Biological Sciences, Georgia Institute of Technology, Atlanta, GA 30332, USA

\*Correspondence: [joseph.lachance@biology.gatech.edu](mailto:joseph.lachance@biology.gatech.edu)

<https://doi.org/10.1016/j.ajhg.2022.12.012>

© 2022 American Society of Human Genetics.

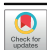

the magnitude of estimated sex-biased admixture. We found that violations of demographic assumptions can lead to misestimations of sex biases, but unassigned genetic ancestry was likely the primary confounding factor in the analyses of Micheletti et al.<sup>1</sup> Furthermore, we found that the models are highly sensitive to small changes in the inferred mean ancestry proportions, complicating the interpretation of results. Thus, the large sex ratios reported by Micheletti et al. are most likely the result of unassigned ancestry in their study and the sensitivity of the applied models. Altogether, we caution against over-interpreting models when genetic ancestries do not add up to 100%.

## Material and Methods

### Population genetic models for estimating sex-biased admixture

Here, we briefly describe two models that were applied by Micheletti et al. to infer sex-biased admixture from X chromosomal and autosomal ancestry proportions.<sup>1</sup> We start with a description of an equilibrium model that assumes an infinite number of generations since admixture, and then we describe a model developed by Goldberg and Rosenberg that considers a more recent admixture event.<sup>8</sup>

The equilibrium model for estimating the sex-biased admixture using X chromosomal and autosomal ancestry proportions is easily derived by noticing the sex-specific inheritance of the X chromosome. Females contribute two-thirds of the X chromosomes and males one-third, while females and males contribute an equal number of autosomes.<sup>7</sup> In the limit of infinite generations since the admixture event, the equilibrium sex ratio for ancestry  $S_1$  is

$$\frac{s_1^f}{s_1^m} = \frac{3H_1^X - 2H_1^A}{4H_1^A - 3H_1^X} \quad (\text{Equation 1})$$

where  $s_1^f$  and  $s_1^m$  are the female and male contributions from  $S_1$  and  $H_1^X$  and  $H_1^A$  are the observed ancestry proportions of X chromosomes and autosomes in the admixed population ( $H$ ) coming from  $S_1$ , respectively. A sex ratio greater than one ( $s_1^f/s_1^m > 1$ ) implies female-biased admixture, whereas a sex ratio between zero and one ( $0 < s_1^f/s_1^m < 1$ ) implies male-biased admixture. For a detailed derivation of Equation 1, see the [supplemental information](#).

Goldberg and Rosenberg proposed a model that captures the dynamics of sex-specific contributions for the first few generations after a single admixture pulse.<sup>8</sup> Their model is based on the observation that the X chromosomal ancestry proportion in males depends only on the X chromosomal ancestry proportion in females in the previous generation, leading to an oscillation of the X chromosomal ancestry proportion during the first few generations after admixture. This oscillation of X chromosomal ancestry proportions implies a time dependence during the early generations after admixture that also applies to inferred sex ratios. However, after approximately ten generations of random mating within the admixed population, the expected X chromosomal ancestry proportions in females and males converge to an equilibrium value (Figure 2 in Goldberg and Rosenberg).<sup>8</sup> Thus, the sex ratio under this dynamic model converges to Equation 1. For more details, see the original publication by Goldberg and Rosen-

berg.<sup>8</sup> Both models implicitly assume a constant population size, no gene flow, random mating, no genetic drift, and no selection after initial admixture.

### Additional simulations of American admixture

To evaluate whether the analyses of Micheletti et al. were confounded by violations of demographic assumptions, we simulated different demographic scenarios after initial admixture. Specifically, we simulated exponential population growth of the admixed population, subsequent gene flow into the admixed population, and sex-specific assortative mating. For each scenario, we simulated diploid individuals with a single 100 Mb autosome, 100 Mb sex chromosomes (X and Y), and 20 kb mtDNA using SLiM v3.7.1.<sup>20</sup>

Prior to admixture, African ( $S_1$ ), European ( $S_2$ ), and Native American/East Asian ( $S_3$ ) ancestries were simulated as three continental ancestries according to the Gravel 2011 demographic model.<sup>21</sup> Initial American admixture was then simulated 15 generations ago as a three-way admixture of  $S_1$ ,  $S_2$ , and  $S_3$  with the admixture proportions 1/6, 1/3, and 1/2, respectively (proportions taken from Browning et al.<sup>13</sup>). Initial contributions from  $S_1$  and  $S_3$  were female biased, with ratios of 2 and 1.25 females to 1 male, respectively. Initial contributions from  $S_2$  were male biased, with a ratio of 2 males to 1 female. Note that the proportions and sex biases used do not necessarily represent historical realities. Instead, they are used to quantitatively assess the effect of different demographic scenarios when inferring sex-biased admixture.

A single-pulse admixture scenario was simulated as the null model. Additional simulations incorporated exponential growth of the admixed population, constant gene flow from the source populations into the admixed population, and/or sex-specific assortative mating. First, exponential growth of the admixed population was simulated at a rate of  $r = 0.05$ . Second, constant gene flow from all three source populations into the admixed population was simulated at migration rates  $m_1 = 0.05$ ,  $m_2 = 0.025$ , and  $m_3 = 0.01$ , with the same sex biases as used during the initial admixture. Third, we simulated sex-specific assortative mating with  $S_2$  females being asymmetrically more likely to mate with  $S_2$  males. This was achieved by replacing a non- $S_2$  male mating with an  $S_2$  female with an  $S_2$  male in 40% of the cases (i.e.,  $p = 0.4$ ). In this mating scheme, female contributions from the different populations remain unchanged, but  $S_2$  males contribute more than expected under a random mating scheme (Table S3). We also simulated a more extreme case of sex-specific assortative mating with  $p = 0.9$ .

Simulated X chromosomes and autosomes were LD pruned using plink2<sup>22</sup> before estimating ancestry proportions using ADMIXTURE.<sup>23</sup> Simulated mtDNA and Y chromosomes in admixed individuals were assigned to different ancestries based on proximity to ancestral haplogroup clusters. A detailed description of the simulations can be found in [supplemental information](#).

### Re-estimation of sex ratios based on ancestry proportions and haplogroup frequencies from Micheletti et al.

Micheletti et al. appear to have miscalculated  $s_1^f/s_1^m$  ratios, i.e., they miscalculated sex ratios when using the model of Goldberg and Rosenberg (see [results and discussion](#)).<sup>1,8</sup> To assess the impact of this on the results of Micheletti et al., we implemented the model by Goldberg and Rosenberg<sup>8</sup> to re-estimate sex ratios based on the ancestry proportions in Table S9 of Micheletti et al.<sup>1</sup> Since the

**Table 1. Re-estimation of sex bias reveals the confounding effects of unassigned ancestry**

| Region            | African       |               |       |       | European |               |               |       | Native American |        |               |               | Unassigned ancestry |       |        |                |                |
|-------------------|---------------|---------------|-------|-------|----------|---------------|---------------|-------|-----------------|--------|---------------|---------------|---------------------|-------|--------|----------------|----------------|
|                   | $s_M^f/s_M^m$ | $s_R^f/s_R^m$ | $H^X$ | $H^A$ | $mt/Y$   | $s_M^f/s_M^m$ | $s_R^f/s_R^m$ | $H^X$ | $H^A$           | $mt/Y$ | $s_M^f/s_M^m$ | $s_R^f/s_R^m$ | $H^X$               | $H^A$ | $mt/Y$ | $1 - \sum H^X$ | $1 - \sum H^A$ |
| Guianas           | 1.73          | 1.71          | 0.650 | 0.598 | 1.27     | 0.22          | 0.23          | 0.122 | 0.154           | 0.32   | -             | -             | 0.039               | 0.043 | -      | 0.189          | 0.205          |
| United States     | 1.47          | 1.48          | 0.756 | 0.710 | 1.35     | 0.33          | 0.33          | 0.206 | 0.248           | 0.25   | -             | -             | 0.029               | 0.023 | 3.05   | 0.009          | 0.019          |
| British Caribbean | 1.88          | 1.86          | 0.824 | 0.749 | 1.52     | 0.04          | -0.03         | 0.119 | 0.184           | 0.09   | -             | -             | 0.014               | 0.013 | 1.74   | 0.043          | 0.054          |
| Latin Caribbean   | 13.3          | 10.3          | 0.237 | 0.186 | 1.24     | 1.11          | 1.11          | 0.531 | 0.522           | 0.21   | 3.78          | -4.08         | 0.155               | 0.100 | 43.66  | 0.077          | 0.192          |
| C. South America  | 4.62          | -5.56         | 0.182 | 0.123 | 1.62     | 0.92          | 0.93          | 0.632 | 0.640           | 0.34   | 2.26          | -2.44         | 0.115               | 0.064 | -      | 0.071          | 0.173          |
| N. South America  | 17.2          | 10.5          | 0.139 | 0.109 | 1.03     | 0.44          | 0.47          | 0.430 | 0.489           | 0.09   | 3.38          | -3.80         | 0.363               | 0.231 | 15.64  | 0.068          | 0.171          |
| Central America   | 15.6          | 10.9          | 0.106 | 0.083 | 0.55     | 1.12          | 1.12          | 0.321 | 0.315           | 0.13   | 28.0          | 15.7          | 0.507               | 0.392 | 3.47   | 0.066          | 0.210          |
| Cabo Verde        | 22.6          | -81.4         | 0.593 | 0.442 | 2.50     | 0.01          | 0.05          | 0.351 | 0.504           | 0.09   | -             | -             | 0.002               | 0.004 | -      | 0.054          | 0.050          |

X chromosomal ( $H^X$ ) and autosomal ( $H^A$ ) ancestry proportions from Table S9 in Micheletti et al.<sup>1</sup> were used to infer ratios of female to male ancestry contributions for each admixed population after 15 generations of random mating ( $s^f/s^m$ ). Subscripts indicate whether sex ratios refer to the original miscalculated values reported by Micheletti et al. ( $s_M^f/s_M^m$ ) or the re-estimated sex ratios from our study ( $s_R^f/s_R^m$ , see Table S4 for all generations). Ratios of female to male contributions were not calculated when ancestry proportions were below 0.05.  $mt/Y$  refers to ratios of mtDNA and Y chromosome haplogroup frequencies inferred from Table S8 of Micheletti et al.<sup>1</sup> Unexpectedly large sex ratios and model failure occur more often when there are large fractions of unassigned ancestry—especially when the amount of unassigned ancestry differs between X chromosomes and autosomes. There are also multiple situations where the direction of sex bias from X chromosomal and autosomal data is discordant with the direction inferred from mtDNA and Y chromosome haplogroups.

model by Goldberg and Rosenberg also requires knowing the fraction of sampled females and males, we inferred those for each broad region from Tables S2 and S10 in Micheletti et al.<sup>1</sup> (Table S1 in our paper). mtDNA and Y chromosome haplogroup imbalances were inferred from reported haplogroup frequencies in Table S8 in Micheletti et al.<sup>1</sup> (Table S2 in our paper). Note that there are inconsistencies between the reported Native American ancestry proportions in Table 1 of Micheletti et al. and Table S9 of Micheletti et al., as well as internal inconsistencies between ancestry proportions reported for granular and broad regions in their Table S9.<sup>1</sup> Here, we chose to use the numbers found in the “ancestry composition by broad region” section of Table S9 in Micheletti et al.,<sup>1</sup> as more significant digits were reported there.

### Computation of confidence intervals for sex ratios

As we shall see, the models are highly sensitive to small changes in inferred mean ancestry proportions. For this reason, reporting sex ratios with confidence intervals is preferable over point estimates. A general approach for computing confidence intervals of sex bias estimates involves bootstrapping individual-level ancestry proportions (e.g., obtained using ADMIXTURE<sup>23</sup>). Given  $m$  individuals in the dataset,  $m$  individuals are resampled  $n$  times with replacement, and for each resampling step, mean ancestry proportions and corresponding sex biases are calculated. From the obtained distribution of sex biases, confidence intervals are inferred, e.g., 2.5% and 97.5% percentile. This approach was used to compute 95% confidence intervals of sex bias estimates from simulations. We dynamically set the number of bootstrap samples ( $n$ ) to equal the sample size ( $m$ ). However, we always did at least 500 and at most 10,000 bootstrap resamples.

## Results and discussion

### Re-estimating sex ratios based on summary statistics from Micheletti et al

Micheletti et al. reported sex ratios for 15 generations after admixture in their Table 1.<sup>1</sup> However, their implementation of the model of Goldberg and Rosenberg<sup>8</sup> appears

to be flawed for two reasons. First, the sex ratios reported by Micheletti et al. do not match expectations under the model of Goldberg and Rosenberg, as their implementation of the model does not converge to the expected equilibrium value after approximately 15 generations of random mating (compare  $g = 15$  and  $g = \text{inf}$  in Table S9 in Micheletti et al.).<sup>1</sup> For example, Micheletti et al. inferred that African women contributed approximately 22 times as much as African men to the gene pool of Cabo Verde after 15 generations of mating, but an equilibrium sex ratio of approximately 81 African females to males was reported in Table S9.<sup>1</sup> Second, in some cases, the models are misspecified for the reported ancestry proportions, i.e., they yield non-sensical negative sex ratios, but only positive sex ratios are reported in Table 1 of Micheletti et al. and Table S9 of Micheletti et al.<sup>1</sup> For instance, given the reported African ancestry proportions in Cabo Verde, the equilibrium model yields a non-sensical sex ratio of approximately negative 81 African females to one male instead of the positive 81 reported by Micheletti et al. in Table S9.<sup>1</sup> For these reasons, we re-estimated sex ratios after 15 generations of random mating in admixed populations using the ancestry proportions reported in Table S9 in Micheletti et al.<sup>1</sup> and the model by Goldberg and Rosenberg.<sup>8</sup>

In regions for which Micheletti et al. assigned almost all of the ancestry, such as the United States, the originally reported numbers are reasonable (Table 1). However, unexpectedly large sex ratios, instances of model failure (negative sex ratios), and impossible scenarios like female-biased contributions from all three ancestral populations are observed for geographic regions with substantial amounts of unassigned ancestry. These issues appear to be especially problematic if the amount of unassigned ancestry differs between X chromosomes and autosomes (e.g., in Central America and the Latin Caribbean). We therefore caution

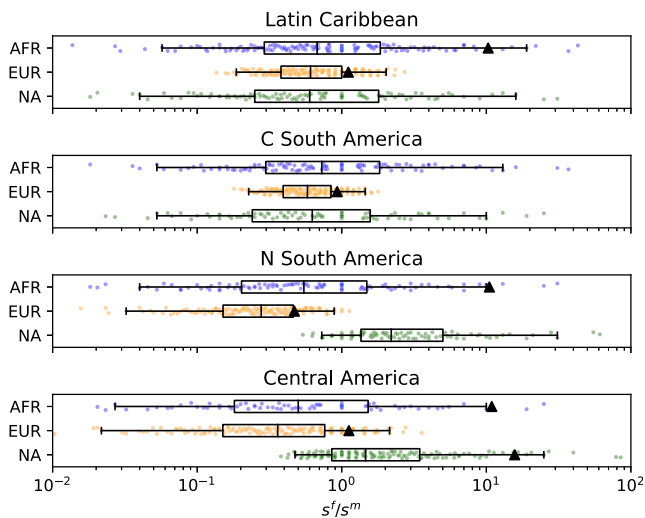

**Figure 1. A wide range of sex ratios is plausible in geographic regions with substantial amounts of unassigned ancestry**  
Missing ancestry in the study by Micheletti et al. for the Latin Caribbean, central South America, northern South America, and Central America was distributed in 1% increments such that ancestry proportions add up to 100%. Corresponding sex ratios were then computed using the equilibrium model (Equation 1). Ancestry proportions that led to model failure were discarded. The boxes represent the inter-quartile range, with the median sex ratio indicated by the line spanning the box. The whiskers represent the range between the 2.5<sup>th</sup> and 97.5<sup>th</sup> percentile. Note that the x axis is logarithmic to show the full range of possible sex ratios but that  $s^f/s^m < 0.1$  and  $s^f/s^m > 10$  are improbable. The clustering of the sex ratios is due to increments of 0.01 that were used for distributing unassigned ancestry. Black triangles correspond to sex ratios estimated from mean ancestry proportions reported by Micheletti et al. (Table 1). If no black triangle is shown, model failure was observed.

against interpreting the  $s^f/s^m$  values observed in Table 1 as the actual ratios of female to male contributions.

### False patterns of sex bias arising from unassigned ancestry

Because many of the irregularities in Micheletti et al. are observed when ancestry estimates do not sum to 100%,<sup>1</sup> we give an example to illustrate how unassigned ancestry can create false patterns of sex bias. We consider a scenario with no underlying sex biases where  $S_1$  contributes 75% of the genetic ancestry to the admixed population and  $S_2$  contributes 25%. We suppose that ancestries are inferred accurately, but 5% of X chromosomal and 10% of autosomal data of each ancestry cannot be unambiguously assigned, i.e., in total, 10% of the X chromosomal and 20% of the autosomal ancestry are left unassigned (these are approximately the proportions of unassigned ancestry for the Latin Caribbean populations in Micheletti et al.<sup>1</sup>). Then, for  $S_1$ , the inferred observed X chromosomal ancestry proportion is  $H_1^X = 0.75 - 0.05 = 0.70$  and the autosomal ancestry proportion is  $H_1^A = 0.75 - 0.1 = 0.65$ . Similarly, for  $S_2$ , the inferred X chromosomal and autosomal ancestry proportions are  $H_2^X = 0.25 - 0.05 = 0.20$  and  $H_2^A = 0.25 - 0.1 = 0.15$ , respectively. In this case,

Equation 1 falsely implies female-biased admixture for  $S_1$  (1.6 females to one male), and the model is not specified for the observed ancestry proportions for  $S_2$ . Note that unassigned ancestry can also create false patterns of male-biased admixture depending on the distribution of missing ancestry. For these reasons, sex ratios from Micheletti et al. reported for the broad regions of the Latin Caribbean, central South America, northern South America, and Central America should be questioned, as 6%–8% X chromosomal and 17%–21% autosomal DNA ancestry were left unassigned (Table 1).<sup>1</sup> Because inferred sex ratios depend on relative X chromosomal and autosomal ancestry proportions, these imbalances between unassigned amounts of X chromosomal and autosomal ancestry further contribute to misestimates of sex bias.

Given the potentially significant confounding effect of unassigned ancestry in the study by Micheletti et al., we distributed the unassigned ancestry in 1% increments to the three source ancestries—African, European, and Native American—such that ancestry proportions sum to 100%. This was done for the geographic regions of the Latin Caribbean, central South America, northern South America, and Central America. Sex ratios were then re-estimated for each possible combination of ancestry proportions using the equilibrium model (Equation 1). Figure 1 shows that wide ranges of sex ratios are possible, given the amounts of unassigned ancestry in these four regions. African contributions (blue) could have been either female- or male-biased based in all four regions. In contrast to this, male-biased European contributions (orange) are persistently indicated, as most of the possible  $s^f/s^m$  values are smaller than one. For Native American contributions (green), it is not possible to definitively say whether they were female or male biased in the Latin Caribbean and central South America, while most ways of distributing the unassigned ancestry suggest female-biased contributions in northern South America and Central America (Figure 1). Interestingly, mean African and Native American ancestry proportions reported by Micheletti et al. yield extreme sex ratios that are in the tails of the distributions of possible  $s^f/s^m$  values (black triangles) or lead to model failure (no black triangle shown). Thus,  $s^f/s^m$  values reported by Micheletti et al. are unlikely to represent true values, illustrating the confounding effects of unassigned ancestry in their study.

### Sensitivity of models to small differences in ancestry proportions

As delineated above, many cases of model failure (i.e., negative sex ratios) are observed based on the data of Micheletti et al. For this reason, we conducted a sensitivity analysis of the equilibrium model, to better understand the conditions that lead to model misspecification. Using two examples, we show that the models are highly sensitive to small differences in inferred ancestry proportions and that the models are only specified for a narrow range of ancestry proportions. For both examples, we use the equilibrium

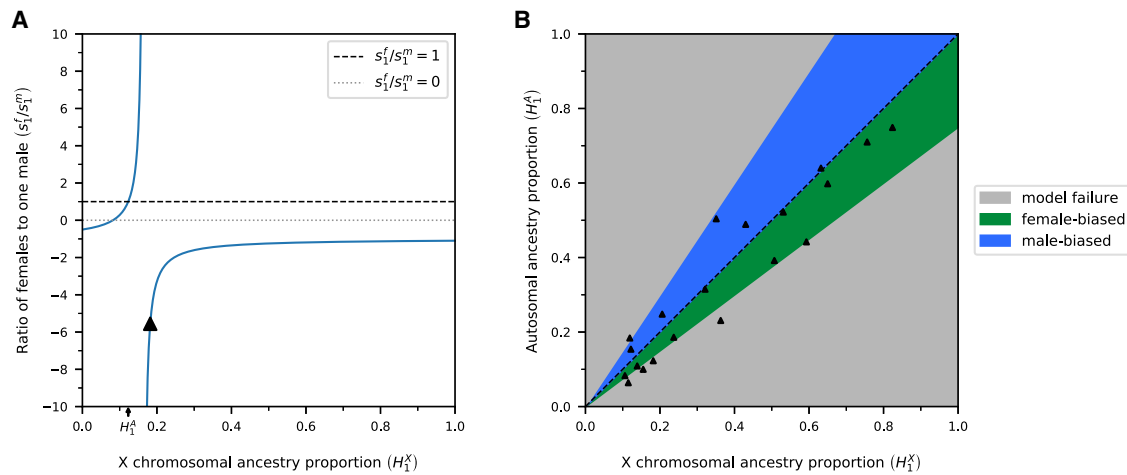

**Figure 2. Estimates of sex-biased admixture from X chromosomes and autosomes are highly sensitive to small differences in ancestry proportions**

$s^f/s^m$  refers to the ratio of female to male contributions, X chromosomal ancestry proportions are represented by  $H_X^X$ , and autosomal ancestry proportions are represented by  $H_A^A$ .

(A) Presuming an autosomal ancestry of 0.123 (i.e., the autosomal African ancestry proportion in central South America reported by Micheletti et al.<sup>1</sup>), X chromosomal ancestry proportions must be in the interval [0.082, 0.164] under a demographic model of a single admixture event. X chromosome-related ancestries outside of this range cause negative sex ratios (i.e., model failure). The black triangle indicates the sex ratio inferred based on the ancestry proportions reported by Micheletti et al. for African ancestry in central South America (Table 1).

(B) Exploration of parameter space for different combinations of autosomal and X chromosomal ancestry proportions. Scenarios that yield female-biased sex ratios ( $s^f/s^m > 1$ ) are colored green, male-biased sex ratios ( $0 < s^f/s^m < 1$ ) are colored blue, and model failures ( $s^f/s^m < 0$ ) are colored gray. Black triangles indicate ancestry proportions reported by Micheletti et al. (Table 1). Most cases of model failure are observed when inferred ancestry proportions are small (black triangles in gray area). No triangle is shown when either the X chromosomal or autosomal ancestry proportion was below 0.05.

model (Equation 1), but the analyses described below also hold for the dynamic model developed by Goldberg and Rosenberg.<sup>8</sup> The models' sensitivity implies that slight differences in inferred ancestry proportions can lead to qualitatively different results or model failure, exacerbating the problem of unassigned ancestry.

First, we assume that the true observed autosomal ancestry proportion for  $S_1$  is 0.123 (the autosomal African ancestry proportion in central South America reported by Micheletti et al.<sup>1</sup>), and the observed X chromosomal ancestry proportion is 0.130. In this case, Equation 1 yields a sex ratio of 1.412 females to 1 male. However, if the X chromosomal ancestry proportion were observed to be 0.120, the sex ratio would be 0.864 females to 1 male. Thus, slight differences in observed ancestry proportions can change the conclusion from female-biased contributions to male-biased contributions, a qualitatively different interpretation (Figure 2A).

Second, we consider the two scenarios when only one sex from  $S_1$  contributes to the admixed population. Again, we suppose a true autosomal ancestry proportion of 0.123 for  $S_1$  (the autosomal African ancestry proportion in central South America reported by Micheletti et al.<sup>1</sup>). If  $S_1$  contributes only females, the expected X chromosomal ancestry proportion for  $S_1$  would be 0.164 (Equation S8), yielding a sex ratio of plus infinity. Due to a singularity of the equilibrium model at this point (Figure 2A), the model is highly sensitive, and inferred sex ratios can vary significantly. Contrarily, if  $S_1$  contributes only males,

the expected X chromosomal ancestry proportion would be 0.082 (Equation S9), yielding a sex ratio of 0. Therefore, plausible X chromosomal ancestry proportions under the demographic model of a single admixture event would be in the interval [0.082, 0.164] in this example. For values outside of these demographically possible limits, a model of a single admixture event is misspecified, yielding negative sex ratios. This was the case for the X chromosomal ancestry proportion inferred by Micheletti et al. (0.182),<sup>1</sup> leading to a non-sensical negative sex ratio (black triangle in Figure 2A). In such cases, models accounting for more complex demographics should be considered.

Figure 2B shows that the equilibrium model (Equation 1) is specified for only a narrow range of observed ancestry proportions, which becomes narrower when the estimated ancestry proportions are close to zero. When Micheletti et al. inferred small ancestry proportions, the combinations of X chromosomal and autosomal ancestry proportions often lead to model failure (black triangles in gray areas in Figure 2B). Furthermore, some of the combinations of X chromosomal and autosomal ancestry proportions inferred by Micheletti et al. are close to regions of the parameter space where the models are most sensitive to small changes in ancestry proportions (black triangles close to the border between the green area and the gray area in Figure 2B). Thus, some of the cases of model failure and large sex ratios observed based on the data of Micheletti et al. may be partially attributed to the sensitivity of the

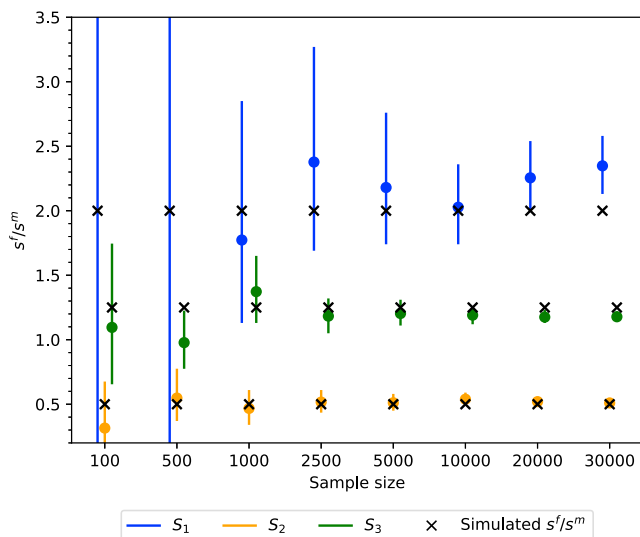

**Figure 3. Large sample sizes are required to confidently estimate the extent of sex-biased admixture using X chromosomal and autosomal ancestry proportions**

Admixture in the Americas was simulated as three-way combinations of source population 1 ( $S_1$ ; blue), source population 2 ( $S_2$ ; orange), and source population 3 ( $S_3$ ; green) with female-biased contributions from  $S_1$  and  $S_3$  (i.e., 2 and 1.25 females to 1 male, respectively) and male-biased contributions from  $S_3$  (i.e., two males to one female). The simulated admixture proportions were 1/6, 1/3, and 1/2 for  $S_1$ ,  $S_2$ , and  $S_3$ , respectively. The crosses indicate the simulated sex ratio ( $s^f/s^m$ ), filled circles indicate mean estimates, and error bars represent 95% confidence intervals.

models, especially when small ancestry contributions were inferred (Table 1; Figure 2B).

### Effects of small sample sizes on the inference of sex bias

The above-demonstrated sensitivity of the models also implies that sample sizes may be a confounding factor due to sampling errors. While Micheletti et al. generally had large sample sizes for most geographic regions (i.e., >1,500), sample sizes were less than 300 for both Cabo Verde and the Guianas.<sup>1</sup> To evaluate what sample sizes are necessary to confidently infer sex-biased admixture, we simulated sex-biased American admixture 15 generations ago (see material and methods). We sampled between 100 and 30,000 random individuals and computed mean ancestry proportions as well as corresponding sex ratios with confidence intervals for 15 generations after admixture, i.e., the model by Goldberg and Rosenberg.<sup>8</sup>

Generally, confidence intervals of sex ratios are a function of the sample size as well as the level of inferred ancestry proportions. For small sample sizes and low inferred ancestry proportions, the confidence intervals are large, precluding any statement about the extent of sex bias (Figure 3). This is because the models exhibit greater sensitivity to slight changes in ancestry proportions if inferred ancestry proportions are low (Figure 2B). Sample sizes of 1,000 or greater are sufficient to guarantee reasonable confidence intervals for ancestries that made medium or large (i.e.,  $H_1^A > 0.3$ ) contributions to the

admixed population (i.e.,  $S_2$  and  $S_3$ ), while sample sizes of 5,000 or greater are required to yield reasonably narrow confidence for ancestries that made only small contributions (i.e.,  $S_1$  component is 1/6; Figure 3). Thus, for Cabo Verde and the Guianas sampling uncertainty and presumably large confidence intervals preclude any definitive statement regarding sex-biased admixture in the study by Micheletti et al.

### Complications arising from violations of demographic assumptions

Micheletti et al. applied models for estimating sex bias that assume constant population size, no subsequent gene flow, and random mating after initial admixture.<sup>8</sup> However, admixture in the Americas as a consequence of the European colonization and the transatlantic slave trade was more complex than a single admixture event.<sup>13–19</sup> Here, we used simulations to evaluate whether violations of these demographic assumptions may have confounded the analyses of Micheletti et al. The following analyses are based on sample sizes of 10,000 individuals. Inferred sex ratios under different demographic scenarios for 15 generations after admixture are listed in Table 2.

Recent analyses have shown that admixed populations in the Americas experienced population expansion after admixture.<sup>13</sup> In our simulations, exponential growth of the admixed American population at a rate of  $r = 0.05$  did not affect the sex ratios inferred from X chromosomal and autosomal data nor mtDNA and Y chromosome haplogroup imbalances. Differences between simulated and estimated sex ratios are due to the sensitivity of the models (Table 2). This suggests that population growth alone cannot have caused the large sex ratios estimated by Micheletti et al.

### Constant, sex-biased gene flow

Historically, admixture in the Americas involved continuous gene flow as opposed to a single admixture event.<sup>19</sup> Although our simulations show that constant gene flow from source populations into an admixed population changes estimates of sex bias, it does not yield as extreme  $s^f/s^m$  values as reported by Micheletti et al.<sup>1</sup> Note that these effects are weaker when population growth is also present (Table 2).

We also investigated whether an additional constant gene flow model from Goldberg and Rosenberg<sup>8</sup> better fits the data of Micheletti et al. In regions with nearly complete ancestry assignments, this model yields a range of smaller  $s^f/s^m$  values that consistently indicate sex biases in one direction (e.g., United States). However, in geographic regions with substantial unassigned ancestry, either female or male sex bias fits the data (e.g., European ancestry in Central America; Figure S1). For these reasons, constant gene flow after initial admixture likely contributed to the extreme sex ratios reported by Micheletti et al., but unassigned ancestry appears to be the more important confounding factor.

**Table 2. Evaluation of the effect of different demographic scenarios on the sex ratios inferred from X chromosomal and autosomal ancestry proportions**

| Demography                                                            | $S_1$               |                           |                           |                     | $S_2$               |                           |                           |                     | $S_3$               |                           |                           |                     |
|-----------------------------------------------------------------------|---------------------|---------------------------|---------------------------|---------------------|---------------------|---------------------------|---------------------------|---------------------|---------------------|---------------------------|---------------------------|---------------------|
|                                                                       | $s^f/s^m$           | $H^X$                     | $H^A$                     | mt/Y                | $s^f/s^m$           | $H^X$                     | $H^A$                     | mt/Y                | $s^f/s^m$           | $H^X$                     | $H^A$                     | mt/Y                |
| Simulated parameters (single pulse)                                   | 2.00                | 0.1852                    | 0.1667                    | 2.00                | 0.50                | 0.2963                    | 0.3333                    | 0.50                | 1.25                | 0.5200                    | 0.5000                    | 1.25                |
| Single pulse                                                          | 2.02<br>(1.73–2.37) | 0.1828<br>(0.1797–0.1859) | 0.1644<br>(0.1624–0.1664) | 1.70<br>(1.57–1.84) | 0.54<br>(0.49–0.59) | 0.2974<br>(0.2937–0.3011) | 0.3305<br>(0.3280–0.3330) | 0.48<br>(0.46–0.51) | 1.19<br>(1.12–1.26) | 0.5198<br>(0.5158–0.5238) | 0.5051<br>(0.5025–0.5078) | 1.33<br>(1.28–1.38) |
| Population growth                                                     | 2.56<br>(2.15–3.06) | 0.1861<br>(0.1830–0.1891) | 0.1624<br>(0.1604–0.1644) | 1.37<br>(1.27–1.47) | 0.38<br>(0.34–0.41) | 0.286<br>(0.2824–0.2896)  | 0.3369<br>(0.3344–0.3394) | 0.60<br>(0.57–0.63) | 1.39<br>(1.31–1.48) | 0.5280<br>(0.5240–0.5319) | 0.5007<br>(0.4980–0.5033) | 1.21<br>(1.17–1.26) |
| Gene flow                                                             | 1.78<br>(1.58–2.00) | 0.3475<br>(0.3422–0.3527) | 0.3179<br>(0.3143–0.3216) | 1.61<br>(1.52–1.70) | 0.42<br>(0.37–0.47) | 0.2378<br>(0.2335–0.2421) | 0.2758<br>(0.2725–0.2790) | 0.43<br>(0.41–0.46) | 1.13<br>(1.04–1.23) | 0.4147<br>(0.4097–0.4199) | 0.4063<br>(0.4027–0.4099) | 1.21<br>(1.16–1.26) |
| Population growth + gene flow                                         | 1.64<br>(1.46–1.85) | 0.3089<br>(0.3043–0.3136) | 0.2858<br>(0.2825–0.2891) | 1.76<br>(1.66–1.87) | 0.55<br>(0.49–0.61) | 0.2636<br>(0.2595–0.2677) | 0.2922<br>(0.2891–0.2953) | 0.37<br>(0.35–0.39) | 1.08<br>(1.00–1.17) | 0.4274<br>(0.4227–0.4322) | 0.4220<br>(0.4187–0.4252) | 1.51<br>(1.44–1.59) |
| Sex-specific assortative mating (40%)                                 | 2.96<br>(2.42–3.66) | 0.1671<br>(0.1642–0.1700) | 0.1436<br>(0.1416–0.1454) | 4.48<br>(3.92–5.12) | 0.39<br>(0.36–0.42) | 0.3755<br>(0.3715–0.3793) | 0.4403<br>(0.4375–0.4430) | 0.28<br>(0.27–0.29) | 1.85<br>(1.71–2.00) | 0.4574<br>(0.4534–0.4614) | 0.4162<br>(0.4135–0.4188) | 4.97<br>(4.60–5.39) |
| Sex-specific assortative mating (40%) + gene flow                     | 2.76<br>(2.33–3.27) | 0.2826<br>(0.2780–0.2873) | 0.2446<br>(0.2414–0.2479) | 3.94<br>(3.60–4.32) | 0.31<br>(0.28–0.34) | 0.3303<br>(0.3259–0.3348) | 0.4009<br>(0.3975–0.4042) | 0.23<br>(0.22–0.24) | 1.76<br>(1.59–1.95) | 0.3871<br>(0.3823–0.3919) | 0.3545<br>(0.3513–0.3578) | 3.18<br>(2.96–3.42) |
| Sex-specific assortative mating (40%) + gene flow + population growth | 2.30<br>(1.98–2.70) | 0.2829<br>(0.2782–0.2877) | 0.2502<br>(0.2469–0.2534) | 3.42<br>(3.16–3.70) | 0.41<br>(0.38–0.45) | 0.3422<br>(0.3376–0.3468) | 0.3971<br>(0.3937–0.4005) | 0.23<br>(0.22–0.24) | 1.46<br>(1.33–1.61) | 0.3748<br>(0.3702–0.3795) | 0.3527<br>(0.3496–0.3561) | 2.99<br>(2.78–3.22) |
| Sex-specific assortative mating (90%)                                 | 7.63<br>(–335–364)  | 0.0947<br>(0.0922–0.0972) | 0.0719<br>(0.0705–0.0733) | 30.1<br>(22.3–41.8) | 0.51<br>(0.49–0.54) | 0.6678<br>(0.6633–0.6724) | 0.7478<br>(0.7452–0.7504) | 0.19<br>(0.19–0.20) | –336<br>(–395–463)  | 0.2375<br>(0.2336–0.2414) | 0.1803<br>(0.1780–0.1825) | 29.0<br>(23.7–35.9) |

For each scenario, the initial admixture of  $S_1$ ,  $S_2$ , and  $S_3$  was simulated with admixture proportions 1/6, 1/3, and 1/2, respectively.  $S_1$ 's and  $S_3$ 's contributions were female biased with ratios of 2 females and 1.25 females to 1 male, and  $S_2$ 's contributions were male biased with a ratio of 2 males to 1 female. Additionally, exponential population growth was simulated at a rate of  $r = 0.05$ , constant gene flow from the source populations into the admixed population was modeled at population-specific rates of  $m_1 = 0.05$ ,  $m_2 = 0.025$ , and  $m_3 = 0.01$ , and sex-specific assortative mating was simulated according to the mating scheme shown in Table S3 with  $p = 0.4$  and  $p = 0.9$ . The expected X chromosomal and autosomal proportions for a single admixture event with the above parameterization are shown in the first row of this table (computed using Equations 5, 12, and 13 in Goldberg and Rosenberg<sup>8</sup>). Confidence intervals are given in parentheses for each point estimate.

### Sex-specific assortative mating

Given well-established historical accounts, random mating did not happen in the Americas or was even prevented through anti-miscegenation laws.<sup>14–18</sup> These appalling laws and other social norms led to sex-specific assortative mating. To evaluate the effect of sex-specific assortative on sex ratios inferred from X chromosomal and autosomal data by Micheletti et al., we performed simulations in which  $S_2$  females were asymmetrically more likely to mate with  $S_2$  males (Table S3).

In concordance with theory,<sup>24</sup> our simulations show that sex-specific assortative mating confounds estimates of sex biases from X chromosomal and autosomal ancestry proportions (Table 2). Extreme sex-specific assortative mating (i.e., a non- $S_2$  male is rejected 90% of the time as a mating partner of an  $S_2$  female and replaced with an  $S_2$

male ( $p = 0.9$ )) can cause model failure, but it also leads to extreme mitochondrial and Y chromosome haplogroup imbalances. If sex-specific assortative mating was a major factor confounding the estimates of sex bias from X chromosomal and autosomal ancestry proportions by Micheletti et al., it should also be reflected in mtDNA and Y chromosome haplogroup imbalances, which is not the case (see Table 1 in Micheletti et al. and Table S8 in Micheletti et al.).<sup>1</sup> Furthermore, sex-specific assortative mating ( $p = 0.4$ ), constant gene flow, and population growth do not enhance each other in ways that lead to model failure, given the current parameterization (Table 2). For these reasons, although sex-specific assortative mating may have contributed to the extreme sex ratios, it appears that unassigned ancestry was a more important confounding factor in the study by Micheletti et al.



## Conclusions

The racist legacy of the slave trade has undoubtedly left its mark in the genomes of admixed individuals in the Americas. However, our findings suggest that the extreme sex biases reported by Micheletti et al. are questionable.

Substantial amounts of unassigned ancestry were likely the primary confounding factor in the study by Micheletti et al. (Table 1). This is because artificial deviation of the observed ancestry proportions from the true ancestry proportions can create false patterns of sex-biased admixture, explaining the observed exorbitant sex ratios and cases of model failure (i.e., negative sex ratios). The problem of unassigned ancestry is further exacerbated if different amounts of X chromosomal and autosomal ancestry are missing. Unassigned ancestry arises when genomic windows have multiple competing ancestries with low posterior probabilities. Low posterior probabilities are oftentimes observed in admixed individuals with Native American ancestry due to the lack of good reference panels.<sup>25–27</sup> This conservative approach to assigning ancestry is justified when reporting ancestries to consumers but leads to problems when ancestry proportions are applied to estimate magnitudes of sex-biased admixture.

While population genetic models provide the theoretical background for inferring sex bias of past admixture events from X chromosomal and autosomal data, their real-world applicability is limited due to their sensitivity. This limitation can partially be addressed by providing confidence intervals, which can be obtained by bootstrapping individual ancestry proportions as described in material and methods. For the present analyses based on the data from Micheletti et al.,<sup>1</sup> we were unfortunately not able to improve the interpretability of their results with confidence intervals because 23andMe's consent and privacy guidelines limit the availability of individual-level genotype data.<sup>1</sup> This underscores the importance of open data-sharing policies.<sup>28</sup> Overall, we caution that inference methods of sex-biased admixture that use X chromosomal and autosomal data perform poorly when ancestry proportions do not add up to 100% and that reconstructing recent human history from genetic data requires both accurate data and appropriate models.

## Data and code availability

The code and all data needed to reproduce the results presented in this study are available at [https://github.com/LachanceLab/sex\\_biased\\_admixture](https://github.com/LachanceLab/sex_biased_admixture). The referenced supplemental tables from the study by Micheletti et al. are available at <https://doi.org/10.1016/j.ajhg.2020.06.012>.

## Supplemental information

Supplemental information can be found online at <https://doi.org/10.1016/j.ajhg.2022.12.012>.

## Acknowledgments

The authors thank Tomas Bruna and members of the Center for Integrative Genomics at Georgia Tech for their helpful suggestions and critiques. We also thank two anonymous reviewers for their thoughtful and constructive comments that helped to improve the manuscript. This work was supported by an NIGMS MIRA grant to J.L. (R35GM133727). This research was supported in part through research cyberinfrastructure resources and services provided by the Partnership for an Advanced Computing Environment (PACE) at Georgia Institute of Technology, Atlanta, Georgia, USA.

## Declaration of interests

The authors declare no competing interests.

Received: September 20, 2022

Accepted: December 20, 2022

Published: February 2, 2023

## References

1. Micheletti, S.J., Bryc, K., Ancona Esselmann, S.G., Freyman, W.A., Moreno, M.E., Poznik, G.D., Shastri, A.J., 23andMe Research Team, Beleza, S., Mountain, J.L., et al. (2020). Genetic consequences of the transatlantic slave trade in the Americas. *Am. J. Hum. Genet.* *107*, 265–277.
2. Micheletti, S.J., Ancona Esselmann, S.G., Bryc, K., and Mountain, J.L. (2023). Response to Pfennig and Lachance. *Am. J. Hum. Genet.* *110*. <https://doi.org/10.1016/j.ajhg.2022.12.016>.
3. Kayser, M., Brauer, S., Schädlich, H., Prinz, M., Batzer, M.A., Zimmerman, P.A., Boatman, B.A., and Stoneking, M. (2003). Y chromosome STR haplotypes and the genetic structures of U.S. populations of African, European, and Hispanic ancestry. *Genome Res.* *13*, 624–634.
4. Parra, E.J., Marcini, A., Akey, J., Martinson, J., Batzer, M.A., Cooper, R., Forrester, T., Allison, D.B., Dekka, R., Ferrell, R.E., and Shriver, M.D. (1998). Estimating African American admixture proportions by use of population-specific alleles. *Am. J. Hum. Genet.* *63*, 1839–1851.
5. Parra, E.J., Kittles, R.A., Argyropoulos, G., Pfaff, C.L., Hiester, K., Bonilla, C., Sylvester, N., Parrish-Gause, D., Garvey, W.T., Jin, L., et al. (2001). Ancestral proportions and admixture dynamics in geographically defined African Americans living in South Carolina. *Am. J. Phys. Anthropol.* *114*, 18–29.
6. Bryc, K., Durand, E.Y., Macpherson, J.M., Reich, D., and Mountain, J.L. (2015). The genetic ancestry of african americans, latinos, and european americans across the United States. *Am. J. Hum. Genet.* *96*, 37–53.
7. Lind, J.M., Hutcheson-Dilks, H.B., Williams, S.M., Moore, J.H., Essex, M., Ruiz-Pesini, E., Wallace, D.C., Tishkoff, S.A., O'Brien, S.J., and Smith, M.W. (2007). Elevated male European and female African contributions to the genomes of African American individuals. *Hum. Genet.* *120*, 713–722.
8. Goldberg, A., and Rosenberg, N.A. (2015). Beyond 2/3 and 1/3: the complex signatures of sex-biased admixture on the X chromosome. *Genetics* *201*, 263–279.
9. Patin, E., Lopez, M., Grollemund, R., Verdu, P., Harmant, C., Quach, H., Laval, G., Perry, G.H., Barreiro, L.B., Froment, A.,

- et al. (2017). Dispersals and genetic adaptation of Bantu-speaking populations in Africa and North America. *Science* 356, 543–546.
10. Genetic Impact of African Slave Trade Revealed in DNA Study. “BBC News. 24 July 2020. <https://www.nytimes.com/2020/07/23/science/23andme-african-ancestry.html>. Accessed 24 May 2022.
  11. Kenneally, C. (2020). DNA Study from 23andMe Traces Violent History of American Slavery (The New York Times). <https://www.nytimes.com/2020/07/23/science/23andme-african-ancestry.html>. Accessed 24 May 2022.
  12. Kaur, H. (2020). 23andMe DNA Study Offers Insight into the Horrific Story of the Trans-Atlantic Slave Trade (CNN). <https://www.cnn.com/2020/07/26/us/dna-transatlantic-slave-trade-study-scen-trnd/index.html>. Accessed 24 May 2022.
  13. Browning, S.R., Browning, B.L., Daviglus, M.L., Durazo-Arvizu, R.A., Schneiderman, N., Kaplan, R.C., and Laurie, C.C. (2018). Ancestry-specific recent effective population size in the Americas. *PLoS Genet.* 14, 10073855–e1007422.
  14. Pascoe, P. (2009). *What Comes Naturally: Miscegenation Law and the Making of Race in America* (Oxford University Press).
  15. Hartman, S.V. (1997). *Scenes of Subjection: Terror, Slavery, and Self-Making in Nineteenth-Century America* (Oxford University Press).
  16. Wallenstein, P. (1994). Race, Marriage, and the Law of Freedom: Alabama and Virginia, 1860s-1960s: Personal Liberty and Private Law. *Chic. Kent. Law Rev.* 70, 371.
  17. Pokorak, J.J. (2006). Rape as a badge of slavery: the legal history of, and remedies for, prosecutorial race-of-victim changing disparities. *Nev. Law J.* 7, 1.
  18. Jennings, T. (1990). “Us colored women had to go though a plenty”: sexual exploitation of African-American Slave women. *J. Wom. Hist.* 1, 45–74.
  19. Jordan, I.K., Rishishwar, L., and Conley, A.B. (2019). Native American admixture recapitulates population-specific migration and settlement of the continental United States. *PLoS Genet.* 15, e1008225.
  20. Haller, B.C., and Messer, P.W. (2019). SLiM 3: forward genetic simulations beyond the Wright–Fisher model. *Mol. Biol. Evol.* 36, 632–637.
  21. Gravel, S., Henn, B.M., Gutenkunst, R.N., Indap, A.R., Marth, G.T., Clark, A.G., Yu, F., Gibbs, R.A., 1000 Genomes Project, and Bustamante, C.D. (2011). Demographic history and rare allele sharing among human populations. *Proc. Natl. Acad. Sci. USA* 108, 11983–11988.
  22. Chang, C.C., Chow, C.C., Tellier, L.C., Vattikuti, S., Purcell, S.M., and Lee, J.J. (2015). Second-generation PLINK: rising to the challenge of larger and richer datasets. *Giga-Science* 4, 7.
  23. Alexander, D.H., Novembre, J., and Lange, K. (2009). Fast model-based estimation of ancestry in unrelated individuals. *Genome Res.* 19, 1655–1664.
  24. Goldberg, A., Rastogi, A., and Rosenberg, N.A. (2020). Assortative mating by population of origin in a mechanistic model of admixture. *Theor. Popul. Biol.* 134, 129–146.
  25. Durand, E., Do, C., Mountain, J., and Macpherson, J.M. (2014). Ancestry composition: a novel, efficient pipeline for ancestry deconvolution. Preprint at bioRxiv. 010512. <https://doi.org/10.1101/010512>.
  26. Maples, B.K., Gravel, S., Kenny, E.E., and Bustamante, C.D. (2013). RFMix: a discriminative modeling approach for rapid and robust local-ancestry inference. *Am. J. Hum. Genet.* 93, 278–288.
  27. Baran, Y., Pasaniuc, B., Sankararaman, S., Torgerson, D.G., Gignoux, C., Eng, C., Rodriguez-Cintron, W., Chapela, R., Ford, J.G., Avila, P.C., et al. (2012). Fast and accurate inference of local ancestry in Latino populations. *Bioinformatics* 28, 1359–1367.
  28. Powell, K. (2021). How a field built on data-sharing became a Tower of Babel. *Nature* 590, 198–201.

**The American Journal of Human Genetics, Volume 110**

**Supplemental information**

**Challenges of accurately estimating sex-biased  
admixture from X chromosomal  
and autosomal ancestry proportions**

**Aaron Pfennig and Joseph Lachance**

## Supplemental Figures

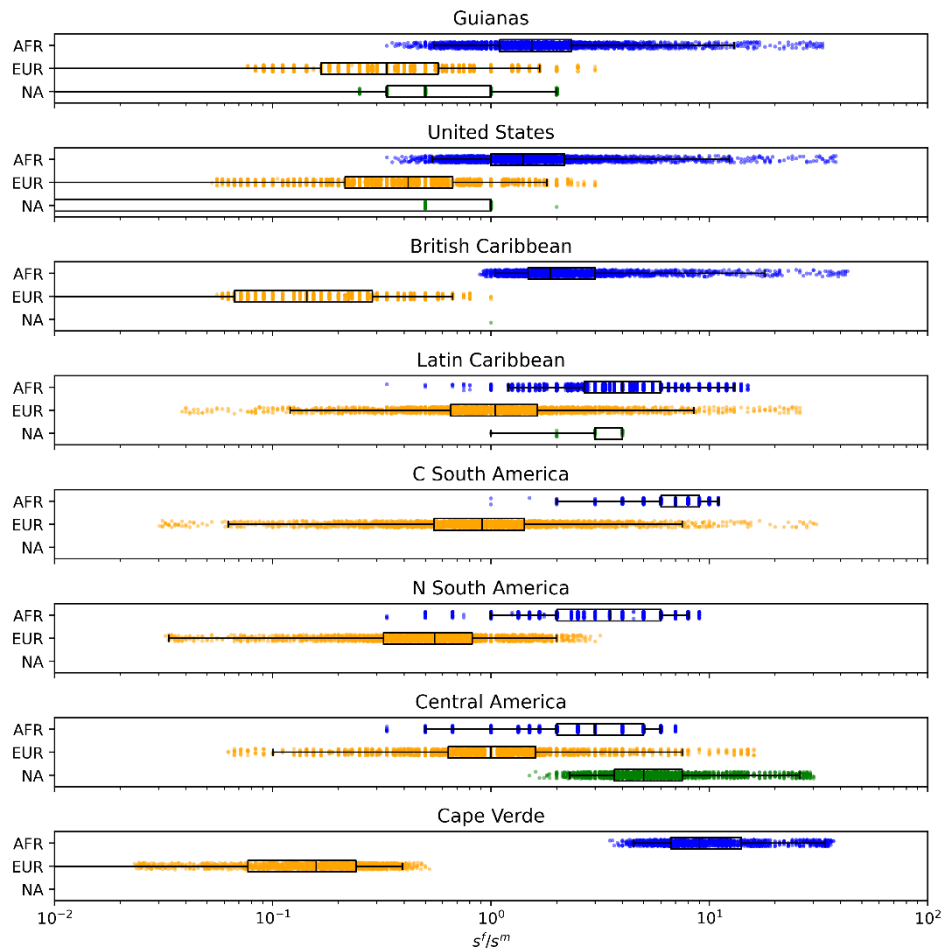

**Figure S1: Possible sex ratios inferred from X chromosomal and autosomal ancestry proportions by Micheletti et al. using a model that assumes constant, nonzero admixture.** Sex ratios were estimated based on ancestry proportion reported in Table S9 in Micheletti et al., for which the Euclidean distance  $D$  (Eq. S13) between the expected admixture proportions and reported admixture proportions was at most 0.01. Because there is not one single solution, a range of values is reported. The boxes represent the inter-quartile range (IQR), with the median sex ratio indicated by the line spanning the box. The whiskers represent the range between 2.5<sup>th</sup> and 97.5<sup>th</sup> percentile. For ancestries for which no box plot is shown, no combination of sex-specific contributions could be found that explains the observed ancestry proportions under a demographic scenario of constant, nonzero admixture.

## Supplemental Tables

| Broad Region                   | Region                                       | $p_f$                        | $p_m$                        | N            |
|--------------------------------|----------------------------------------------|------------------------------|------------------------------|--------------|
| Cabo Verde                     | Cabo Verde                                   | 0.55                         | 0.45                         | 121          |
| C. South America               | Rio De La Plata                              | 0.57                         | 0.43                         | 29           |
| C. South America               | Brazil                                       | 0.51                         | 0.49                         | 1461         |
| N. South America               | Venezuela                                    | 0.48                         | 0.52                         | 495          |
| Central America                | Mexico                                       | 0.55                         | 0.45                         | 3270         |
| Latin Caribbean                | Dominican Republic                           | 0.53                         | 0.47                         | 2307         |
| Guianas                        | Guianas                                      | 0.57                         | 0.43                         | 267          |
| British Caribbean <sup>a</sup> | Trinidad and Tobago                          | 0.61                         | 0.39                         | 282          |
| British Caribbean              | British Leeward Islands and French Caribbean | 0.45                         | 0.55                         | 163          |
| British Caribbean              | Haiti                                        | 0.51                         | 0.49                         | 596          |
| British Caribbean              | Jamaica and the Caymans                      | 0.58                         | 0.42                         | 1526         |
| British Caribbean              | Bahamas                                      | 0.54                         | 0.46                         | 65           |
| United States                  | South Atlantic                               | 0.58                         | 0.42                         | 1235         |
| United States                  | Gulf Coast                                   | 0.59                         | 0.41                         | 1411         |
| United States                  | Inland Midwest                               | 0.60                         | 0.40                         | 235          |
| United States                  | East Inland                                  | 0.57                         | 0.43                         | 340          |
| United States                  | Chesapeake                                   | 0.58                         | 0.42                         | 653          |
| United States                  | Northern States                              | 0.64                         | 0.36                         | 166          |
| N. South America               | Colombia                                     | 0.55                         | 0.45                         | 1029         |
| Central America                | Spanish Caribbean Mainland                   | 0.53                         | 0.47                         | 2766         |
| Latin Caribbean                | Cuba                                         | 0.51                         | 0.49                         | 840          |
| Latin Caribbean                | Puerto Rico                                  | 0.55                         | 0.45                         | 6127         |
| British Caribbean              | British Windward Islands                     | 0.58                         | 0.42                         | 293          |
| United States                  | Midwest                                      | 0.58                         | 0.42                         | 1745         |
|                                |                                              | <b>Mean <math>p_f</math></b> | <b>Mean <math>p_m</math></b> | <b>sum N</b> |
| Guianas                        |                                              | 0.57                         | 0.43                         | 267          |
| United States                  |                                              | 0.58                         | 0.42                         | 5785         |
| British Caribbean              |                                              | 0.56                         | 0.44                         | 2925         |
| Latin Caribbean                |                                              | 0.55                         | 0.45                         | 9274         |
| C. South America               |                                              | 0.51                         | 0.49                         | 1490         |
| N. South America               |                                              | 0.53                         | 0.47                         | 1524         |
| Central America                |                                              | 0.54                         | 0.46                         | 6036         |
| Cabo Verde                     |                                              | 0.55                         | 0.45                         | 121          |

**Table S1. Calculation of female ( $p_f$ ) and male ( $p_m$ ) proportions in samples for each broad region.** The proportions of females and males were inferred based on the data provided in Table S2 and S10 of Micheletti et al.

<sup>a</sup> was once listed under British Caribbean and once under Latin America in Micheletti et al. Based on the language spoken in Trinidad and Tobago, we chose British Caribbean.

♂

|                        |       | $S_1$                          | $S_2$                      | $S_3$                          | $H$                        | Sum female contributions |
|------------------------|-------|--------------------------------|----------------------------|--------------------------------|----------------------------|--------------------------|
| ♀                      | $S_1$ | $s_1^f s_1^m$                  | $s_1^f s_2^m$              | $s_1^f s_3^m$                  | $s_1^f h^m$                | $s_1^f$                  |
|                        | $S_2$ | $s_2^f s_1^m \times (1-p)$     | $s_2^f s_2^m \times c$     | $s_2^f s_3^m \times (1-p)$     | $s_2^f h^m \times (1-p)$   | $s_2^f$                  |
|                        | $S_3$ | $s_3^f s_1^m$                  | $s_3^f s_2^m$              | $s_3^f s_3^m$                  | $s_3^f h^m$                | $s_3^f$                  |
|                        | $H$   | $h^f s_1^m$                    | $h^f s_2^m$                | $h^f s_3^m$                    | $h^f h^m$                  | $h^f$                    |
| Sum male contributions |       | $s_1^m - p \times s_2^f s_1^m$ | $s_2^m + (c-1)s_2^f s_2^m$ | $s_3^m - p \times s_2^f s_3^m$ | $h^m - p \times s_2^f h^m$ |                          |

**Table S3. Mating matrix of sex-specific assortative mating scheme.** Females from  $S_2$  are asymmetrically more likely to mate with males from  $S_2$ . This is modeled in a way such that it does not reduce the overall likelihood of  $S_2$  females mating. In consequence, it inflates the contributions of  $S_2$  males and reduces the contributions of males from other populations (i.e.,  $S_1$ ,  $S_3$ , and  $H$ ).  $p$  is the probability that the mating of a  $S_2$  female with a non- $S_2$  male is rejected, and a male mating partner from  $S_2$  is chosen instead.  $c$  is the corresponding amount by which the mating of an  $S_2$  female and male is increased and is given by:  $c = \frac{1 - (s_2^f s_1^m + s_2^f s_3^m + s_2^f h^m) + p(s_2^f s_1^m + s_2^f s_3^m + s_2^f h^m)}{s_2^f s_2^m}$ .

## Supplemental Methods

In this section, we provide the derivation of the equilibrium model for estimating sex biases from observed X chromosomal and autosomal ancestry proportions after a single admixture event and elaborate on models proposed by Goldberg and Rosenberg for estimating ancestry proportions for a more recent single admixture event as well as constant, nonzero admixture. Both models of a single admixture event were applied by Micheletti et al. to estimate magnitudes of sex-biased admixture from X chromosomal and autosomal data.<sup>1</sup> Because these models make a series of simplifying demographic assumptions that may have confounded the analyses of Micheletti et al.,<sup>1</sup> we evaluated the robustness of the models to violations of these assumptions using simulations. Here, we describe performed simulations of admixture in the Americas and subsequent interrogation of the models of sex-biased admixture regarding their robustness to sampling sizes and violations of demographic assumptions in greater detail.

### Models of sex-biased admixture assuming a single admixture event

#### Equilibrium model

The expected X chromosomal and autosomal ancestry proportions in equilibrium after a single admixture event, i.e., an infinite number of generations of random mating within the admixed population since admixture, are easily inferred by acknowledging that the X chromosomal inheritance is sex-biased, while autosomal inheritance is not. Females contribute two-thirds of the X chromosomes and males one-third, while both sexes contribute half of the autosomes. Following the notation by Goldberg and Rosenberg, we will denote the admixed population by  $H$  and the expected ancestry proportions inherited from source population 1,  $S_1$ , on the X chromosome and the autosomes by  $\mathbb{E}[H_1^X]$  and  $\mathbb{E}[H_1^A]$ , respectively. Given the fraction of females and males originating from  $S_1$  ( $s_1^f$  and  $s_1^m$ , where  $s_1^f + s_1^m = 1$ ),  $\mathbb{E}[H_1^X]$  and  $\mathbb{E}[H_1^A]$  are given by:<sup>2,3</sup>

$$\mathbb{E}[H_1^X] = \frac{2}{3}s_1^f + \frac{1}{3}s_1^m \quad (\text{S1})$$

$$\mathbb{E}[H_1^A] = \frac{1}{2}s_1^f + \frac{1}{2}s_1^m \quad (\text{S2})$$

Solving the Equations S1 and S2 for  $s_1^f$  and  $s_1^m$  yields the sex-specific contributions from  $S_1$ :

$$s_1^f = 3\mathbb{E}[H_1^X] - 2\mathbb{E}[H_1^A] \quad (\text{S3})$$

$$s_1^m = 4\mathbb{E}[H_1^A] - 3\mathbb{E}[H_1^X] \quad (\text{S4})$$

#### A dynamic model for a recent single admixture event

Here, we will briefly review the core ideas of the dynamic model proposed by Goldberg and Rosenberg for the X chromosomal admixture fraction of a recent single admixture event. Interested readers are referred to the original publications for more details.<sup>2,4</sup>

Goldberg and Rosenberg consider the female and male contributions separately, but the overall contributions of  $S_1$  in generation  $g$  ( $s_{1,g}$ ) are the mean of both (i.e.,  $(s_{1,g}^f + s_{1,g}^m)/2$ ). Furthermore, the female (male) contributions across all populations – all ancestral populations plus the admixed population – must sum to one.<sup>2,4,5</sup>

The key idea of Goldberg and Rosenberg is that  $\mathbb{E}[H_1^X]$  and  $\mathbb{E}[H_1^A]$  are not identically distributed because females inherit one X chromosome from each parent, while males only inherit one X chromosome from the mother, which is why the expected X chromosomal ancestry proportion in males is the expected ancestry proportion of a female X chromosome in the previous generation.<sup>2</sup> The authors derive a recursion for this relationship, which has a closed-form solution for a single admixture event (Equations 6-13 in Goldberg and Rosenberg).<sup>2</sup> Thus, the expected female and male ancestry proportions for the X chromosome in generation  $g$  are given by:

$$\mathbb{E}[H_{1,g,f}^X] = \left[ 2 + \left(-\frac{1}{2}\right)^g \right] \frac{s_{1,0}^f}{3} + \left[ 1 - \left(-\frac{1}{2}\right)^g \right] \frac{s_{1,0}^m}{3} \quad (\text{S5})$$

$$\mathbb{E}[H_{1,g,m}^X] = \left[ 2 + \left(-\frac{1}{2}\right)^{g-1} \right] \frac{s_{1,0}^f}{3} + \left[ 1 - \left(-\frac{1}{2}\right)^{g-1} \right] \frac{s_{1,0}^m}{3} \quad (\text{S6})$$

for  $g \geq 1$  and  $g \geq 2$  in Equation S5 and S6, respectively.<sup>2</sup> The mean X chromosomal ancestry proportion is then given by:

$$\mathbb{E}[H_{1,g}^X] = p_f \mathbb{E}[H_{1,g,f}^X] + p_m \mathbb{E}[H_{1,g,m}^X] \quad (\text{S7})$$

where  $p_f$  and  $p_m$  are the fractions of females and males in the sample, respectively (see Equation 24 in Goldberg and Rosenberg).<sup>2</sup> Thus, estimates of initial contributions of females and males from  $S_1$  -  $s_{1,0}^f$  and  $s_{1,0}^m$  - during a single admixture event  $g$  generations ago are obtained by solving Equations S2 and S7 for  $s_{1,0}^f$  and  $s_{1,0}^m$ .

Due to different initial X chromosomal ancestry proportions in females and males, the expected ancestry proportions oscillate during the generations immediately following admixture. However, after approximately ten generations of random mating within the admixed population, the ancestry proportions converge to the expected equilibrium ancestry proportion, defined in Equations S1 and S2 (see Figure 2 in Goldberg and Rosenberg).<sup>2</sup>

This dynamic model and the equilibrium model defined in Equations S1 and S2 implicitly assume a constant population size of the admixed population, no subsequent gene flow, random mating, no genetic drift, and no selection. In the main text, we evaluated the robustness of the models to violations of some of these demographic assumptions using simulations. The simulations are described in detail below.

### Estimating sex bias for a single admixture event

To determine if  $S_1$ 's contributions to an admixed population were sex-biased, we require values for  $s_1^f$  and  $s_1^m$ , which can be obtained by applying one of the models delineated above. The contributions of  $S_1$  are considered sex-biased if  $s_1^f/s_1^m \neq 1$ . For the equilibrium model, the closed-form solution for the ratio of female and male contributions is directly obtained from Equations S3 and S4 and is given by Equation 1 in the main text (for ease of notation, we refer to  $\mathbb{E}[H_1^X]$  and  $\mathbb{E}[H_1^A]$  as  $H_1^X$  and  $H_1^A$  in the main text). The closed-form solution for the ratio of female and male contributions using the model proposed by Goldberg and Rosenberg is more complex and is omitted here.<sup>2</sup>

Assuming a generation time of 25 years, the transatlantic slave trade started approximately 15 generations ago. After 15 generations of random mating within the admixed population, the model proposed by Goldberg and Rosenberg has always converged to the equilibrium model.<sup>2</sup> For these reasons, we report the sex ratios for generation 15 after admixture in Tables 1 & 2. We do not report sex ratios when either of the ancestry proportions is less than 0.05. Note that due to the sensitivity of the models, the results can marginally differ depending on the number of reported significant digits for ancestry proportions. Haplogroup imbalances between mitochondrial Y chromosomal haplogroups were derived from haplogroup frequencies. Code implementing these models can be found at [https://github.com/LachanceLab/sex\\_biased\\_admixture](https://github.com/LachanceLab/sex_biased_admixture).

### Model failure and boundary conditions

Here, we infer conditions for model failure of the equilibrium model using the example shown in Figure 2A. Recall that we assume 0.123 of all autosomes in an admixed population are from  $S_1$  ( $H_1^A = 0.123$ ; this is the autosomal African ancestry proportion in central South America reported by Micheletti et al.<sup>1</sup>) and that there is an equal number of females and males in the admixed population. If all contributing individuals of ancestry  $S_1$  were female, what proportion of all X chromosomes in the admixed population ( $H_1^X$ ) are from ancestry  $S_1$ ? In such a scenario, 12.3% of all initial individuals in the initially admixing population are females from  $S_1$ ,



and 37.7% are females from  $S_2$  (i.e., 24.6% and 75.4% of the females come from  $S_1$  and  $S_2$ , respectively). Since  $S_1$  does not contribute any males, the remaining 50.0% of all initial individuals are males from  $S_2$  (i.e., 100% of all males). Given that each female contributes two X chromosomes, and each male contributes a single X chromosome, the total proportion of X chromosomes from population  $S_1$  for the equilibrium model can be calculated as follows:

$$\mathbb{E}[H_1^X] = \frac{2 \times s_1^f + s_1^m}{2 \times s_1^f + s_1^m + 2 \times s_2^f + s_2^m} = \frac{2 \times 0.246 + 0.0}{2 \times 0.246 + 0.0 + 2 \times 0.754 + 1.0} = 0.164 \quad (\text{S8})$$

Similarly, when all contributing individuals of ancestry  $S_1$  were male, the expected X chromosomal ancestry proportion can be calculated as follows:

$$\mathbb{E}[H_1^X] = \frac{2 \times s_1^f + s_1^m}{2 \times s_1^f + s_1^m + 2 \times s_2^f + s_2^m} = \frac{2 \times 0.0 + 0.246}{2 \times 0.0 + 0.246 + 2 \times 1 + 0.754} = 0.082 \quad (\text{S9})$$

Thus, given the autosomal ancestry proportions  $H_1^A = 0.123$ , the model is only specified for  $H_1^X \in [0.082, 0.164]$ . X chromosomal ancestry proportions outside of this range cause model failure, i.e., negative sex ratios.

Alternatively, boundary conditions of ancestry proportions can also be calculated by considering conditions where either the denominator or the numerator in Equation 1 are zero. The maximum plausible X chromosome ancestry proportion (i.e., when all initial individuals from  $S_1$  are female) is found by setting the left-hand side of Equation S4 equal to zero. Similarly, the minimum plausible X chromosome ancestry proportion (i.e., when all initial individuals from  $S_1$  are male) is found by setting the left-hand side of Equation S3 equal to zero.

## A model of sex-biased admixture assuming constant, nonzero admixture

### The model

Here, we will briefly review the core ideas of the model proposed by Goldberg and Rosenberg for the X chromosomal and autosomal admixture fraction for constant, nonzero admixture. Interested readers are referred to the original publications for more details.<sup>2,4</sup>

The model for constant, nonzero admixture follows the basic logic of the model for a single admixture event described above. In the short term, the ancestry proportions depend on the initial admixture proportions ( $s_{1,0}$  and  $s_{2,0}$ ) and the constant sex-specific contributions ( $s_1^f$ ,  $s_1^m$ , etc.). Additionally, the sex-specific contributions from the admixed population ( $h^f$  and  $h^m$ ) need to be factored in generations following initial admixture. The expected autosomal ancestry proportion is then given by Equation 37 in Goldberg, Verdu, and Rosenberg (2014):<sup>4</sup>

$$\mathbb{E}[H_{1,g}^A] = \begin{cases} s_{1,0}, & g = 1 \\ s_{1,0}h^{g-1} + s_1 \frac{1 - h^{g-1}}{1 - h}, & g \geq 2 \end{cases} \quad (\text{S10})$$

where  $s_1$  and  $h$  are the mean of the constant sex-specific contributions from  $S_1$  and  $H$ , respectively.

Initially, the X chromosomal ancestry proportion in males only depends on the initial female contributions from  $S_1$  (i.e.,  $g = 1$ ). From the second generation on, it depends on the constant female contributions from  $S_1$  (i.e.,  $s_1^f$ ) and the female contributions from the admixed population ( $h^f$ ) together with the X chromosome ancestry proportion in females in the previous generation ( $\mathbb{E}[H_{1,g-1}^X]$ ). Then, the recursion equation for the expected X chromosomal ancestry proportions in males is given by Equation A2 in Goldberg and Rosenberg (2015):<sup>2</sup>

$$\mathbb{E}[H_{1,g,m}^X] = \begin{cases} s_{1,0}^f, & g = 1 \\ s_1^f + h^f \mathbb{E}[H_{1,g-1,f}^X], & g \geq 2 \end{cases} \quad (\text{S11})$$

The X chromosomal ancestry fraction in females depends on the overall constant contributions from source population  $S_1$  (i.e.,  $s_1$ ), the female contributions from the admixed population ( $h^f$ ) together with the X chromosomal ancestry proportion in females in the previous generation ( $\mathbb{E}[H_{1,g-1,f}^X]$ ), and the male contributions from the admixed population ( $h^m$ ) together with the X chromosomal ancestry proportion in males in the previous generation, which is equal to X chromosomal ancestry proportion in females two generations ago ( $\mathbb{E}[H_{1,g-2,f}^X]$ ). The expected X chromosomal ancestry proportion in females is then given by the second-order Equation:

$$\mathbb{E}[H_{1,g,f}^X] = \begin{cases} s_{1,0} & g = 1 \\ s_1 + \frac{1}{2}(s_{1,0}h^f + s_{1,0}^f h^m) & g = 2 \\ s_1 + \frac{h^f}{2} \mathbb{E}[H_{1,g-1,f}^X] + \frac{h^m}{2}(s_1^f + h^f \mathbb{E}[H_{1,g-2,f}^X]) & g \geq 3 \end{cases} \quad (\text{S12})$$

which is Equation A3 in Goldberg and Rosenberg (2015).<sup>2</sup> Goldberg and Rosenberg also derived a closed-form expressions for the expectation of X chromosomal ancestry proportion in females and males (Equations 17 and 18 in their paper), but we omit them here for simplicity.<sup>2</sup>

### Estimating sex bias for constant, nonzero admixture

The expectations of the X chromosomal ancestry proportions in females and males depend on initial admixture proportions and constant contributions during the first few generations immediately after initial admixture. In the long-term, however, the expectations only depend on the constant contributions. Since American admixture happened approximately 15 generations ago, the effect of the initial admixture on the expected X chromosomal ancestry proportion is erased.<sup>2</sup> For this reason, the choices of initial sex-specific contributions have negligible effects on the inferred sex ratios. Here, we chose 0.5 for females and males.

Then, a grid search using 0.02 increments of permissible constant sex-specific contributions (i.e.,  $0 < h < 1$ ) was performed to identify combinations of  $s_1^f$ ,  $s_1^m$ ,  $s_2^f$ , and  $s_2^m$  that can describe the observed ancestry proportions using Equations S10 - S12. The goodness of the parameter fit was assessed by computing the Euclidean distance between the observed ancestry proportions and the expected ancestry proportions:

$$D = \sqrt{[q_A - \mathbb{E}[H_{1,g}^A]]^2 + [q_X - (p_f \mathbb{E}[H_{1,g,f}^X] + p_m \mathbb{E}[H_{1,g,m}^X])]^2} \quad (\text{S13})$$

where  $p_f$  and  $p_m$  are the fraction of females and males in the sample, respectively. Equation S13 is Equation 25 in Goldberg and Rosenberg (2015).<sup>2</sup> We accepted all parameter combinations for which  $D \leq 0.01$ . Furthermore, only parameter combinations were accepted for which the sex ratios were neither zero nor infinity (i.e., when only one sex contributed).

The model deals with a scenario of two-way admixture. We extended it to the present scenario of three-way admixture (i.e., African, European, and Native American admixture) by computing plausible sex-specific contributions for each ancestry separately while aggregating the contributions of the two other ancestries. Code implementing this model can be found at [https://github.com/LachanceLab/sex\\_biased\\_admixture](https://github.com/LachanceLab/sex_biased_admixture).

## Simulations of American admixture and estimation of ancestry proportions

To evaluate how sampling sizes and violations of demographic assumptions impact the results of the above models, we simulated American admixture 15 generations ago. We used Gravel's model of African, European, and Asian demographic history to simulate ancestral continental populations.<sup>6</sup> Then, we simulated three-way admixture of these continental populations with admixture proportions taken from Browning and Browning (2018).<sup>7</sup> Because the admixture proportions were chosen arbitrarily, we replace the notion of African, European, and Asian source populations with source populations 1 ( $S_1$ ), 2 ( $S_2$ ), and 3 ( $S_3$ ), respectively. This is to avoid any misleading associations with a specific ancestry by the reader later in the text.

### American admixture

Prior to admixture, we simulated three continental ancestries using Gravel's model.<sup>6</sup> The ancestral  $S_1$  population had an effective population size of 7,310 and experienced a population size expansion to 14,475 individuals 5,919 generations ago (148kya assuming 25 years per generation). The ancestral population of  $S_2$  and  $S_3$  split 2056 generations ago (~51kya), experiencing an initial bottleneck with a population size of 1,861. The split of  $S_2$  and  $S_3$  occurred 940 generations ago (~23kya).  $S_2$  and  $S_3$  then grew exponentially at rates of 0.38% and 0.48%, respectively. Symmetrical migration between the different populations was simulated at rates determined by Gravel et al.<sup>6</sup> Three-way admixture of  $S_1$ ,  $S_2$ , and  $S_3$  was simulated 15 generations ago, using the admixture proportions from Browning et al. (2018) ( $1/6 S_1$ ,  $1/3 S_2$ , and  $1/2 S_3$ ).<sup>8</sup> The contributions from  $S_1$  and  $S_3$  were simulated to be female-biased with ratios of two and 1.25 females to one male, respectively, while contributions from  $S_2$  were simulated to be male-biased with a ratio of two males to one female. These ratios guaranteed the same number of females and males in the initially admixed population, given the admixture proportions.

Similarly to Gravel et al., we also assumed a recombination rate of  $1 \times 10^{-8}$  and a mutation rate of  $2.36 \times 10^{-8}$  per base pair per generation.<sup>6</sup> The mutation rate is higher than more recent estimates,<sup>9</sup> but we decided to stick to it to ensure realistic levels of genetic diversity.

We simulated a 100 Mb autosome, 100Mb sex chromosomes (X and Y chromosome), and 20 kb mitochondrial DNA in SLiM v3.7.1 using tree-sequence recording.<sup>10,11</sup> Tree-sequence recording allowed to omit neutral mutation during the forward simulations and superimpose them later, increasing computational efficiency. To ensure full coalescence, the tree sequences were first recapitated in Python3 using pyslim v0.7. Subsequently, neutral mutations were added using msprime v1.1.1 in Python3.<sup>12,13</sup> Finally, random individuals were sampled from each population without replacement (i.e.,  $S_1$ ,  $S_2$ ,  $S_3$ , and the admixed population), and the corresponding data was written to a VCF file. Code implementing these simulations can be found at: [https://github.com/LachanceLab/sex\\_biased\\_admixture](https://github.com/LachanceLab/sex_biased_admixture).

### Alternative demographic scenarios

As American admixture was more complex than a simple single admixture event,<sup>8,14–19</sup> we assessed the impact of violations of demographic assumptions on inferred sex ratios by simulating alternative scenarios, including population growth, gene flow after initial admixture, and sex-specific assortative mating.

The models assume a constant population size of the admixed population, but admixed populations in the Americas evidently experienced recent population growth.<sup>8</sup> Therefore, we assessed the effect of population growth on the inferred sex-specific contributions by simulating exponential population growth of the admixed population at a rate of  $r = 0.05$ .

Furthermore, the assumption of no gene flow after initial admixture has been violated during admixture in the Americas.<sup>14</sup> To assess the effect of violations of this assumption, we simulated constant, nonzero gene flow from the source population into the admixed population with a migration rate from  $S_1$  of  $m_1 = 0.05$ , an  $S_2$  migration rate of  $m_2 = 0.025$ , and an  $S_3$  migration rate of  $m_3 = 0.01$ . Constant migration was assumed to have the same sex biases as the initial admixture event (i.e., two  $S_1$  females for every male, two  $S_2$  males for every female, and 1.25  $S_3$  females for every male). As population growth and constant gene flow

both have happened to admixed populations in the Americas, we also assessed the combined effect on inferred sex ratios (i.e.,  $m_1 = 0.05$ ,  $m_2 = 0.025$ ,  $m_3 = 0.01$ , and  $r = 0.05$ ).

From historical records, it is well established that random mating did not occur in admixed populations in the Americas. For instance, European males mated with African or Native American females more frequently than European females mated with African or Native American males as a consequence of anti-miscegenation laws and sexual exploitation of enslaved women by enslavers.<sup>15–19</sup> In previous theoretical work, Goldberg, Rastogi, and Rosenberg showed that assortative mating does not affect sex ratios inferred from X chromosomal and autosomal data because it does not change expected mean ancestry proportions. They showed that assortative mating only increases the variances if mating preferences are symmetrical with respect to sex. However, sex-specific assortative changes expected mean ancestry proportions, and thus the appalling laws and social norms in the aftermath of the transatlantic slave trade may have affected sex ratios inferred from X chromosomal and autosomal data.<sup>20</sup> To evaluate the effect of sex-specific assortative mating, we performed simulations in which  $S_2$  females are asymmetrically more likely to mate with  $S_2$  males. This was achieved by rejecting a mating partner of an  $S_2$  female in 40% of the cases ( $p=0.4$ ) if the partner was a non- $S_2$  male and selecting a random  $S_2$  male instead. In this mating scheme, female contributions from the different populations remain unchanged, but male contributions change, with  $S_2$  males contributing more and males from all other populations contributing less than expected under a random mating scheme (Table S3). For example, for a single admixture event, the male contributions from  $S_2$  are increased by approximately 0.05, while the male contributions from  $S_1$  and  $S_3$  are decreased by approximately 0.01 and 0.04. We also evaluated the effects of more extreme sex-specific assortative mating, rejecting non- $S_2$  males in 90% of the cases ( $p=0.9$ ). Code implementing these simulations can be found at: [https://github.com/LachanceLab/sex\\_biased\\_admixture](https://github.com/LachanceLab/sex_biased_admixture).

## Post-processing

The obtained VCF files were normalized using bcftools v1.14-36-g9560eb.<sup>21</sup> Subsequently, linkage disequilibrium (LD) pruning of SNPs with an  $r^2$  threshold of 0.1 (`--indep-pairwise 50 kb 1 0.1`) and minor allele frequency filtering (MAF  $\geq 0.01$ ) was performed on the simulated X chromosomes and autosomes using plink v2.00a3LM.<sup>22</sup> X chromosomal and autosomal ancestry proportions were then inferred using ADMIXTURE v1.3.0 with  $K=3$ , using sampled individuals from the source populations for supervised training (`--supervised`).<sup>23</sup> Males were treated as haploid on the X chromosome (`--haploid="male:23"`). Admixed individuals with more than 95% of one ancestry were excluded from subsequent analyses.

Established methods for inferring mtDNA and Y chromosome haplogroups such as haplogrep<sup>24</sup> and yHaplo<sup>25</sup> rely on human reference data, and thus cannot be used for inferring haplogroups of our simulated data. Instead, mtDNA and Y chromosome haplogroups were inferred by performing a PCA with plink v2.00a3LM and subsequent clustering of the samples of the three source populations (i.e.,  $S_1$ ,  $S_2$ , and  $S_3$ ). For each cluster, a representative ancestral haplogroup was assigned based on the population from which most individuals in each cluster were sampled. For example, if a cluster consisted of 100 individuals, of which 90 were sampled from  $S_1$ , six from  $S_2$ , and four from  $S_3$ , the representative ancestral haplogroup of this cluster would be  $S_1$ . Admixed individuals were then assigned the ancestral haplogroup of their closest neighbor, who was sampled from one of the source populations.

We tested several clustering algorithms implemented in scikit-learn v1.0.2<sup>26</sup> (incl. agglomerative clustering, k-Means, DBSCAN, affinity propagation, spectral clustering, and mean shift) with various hyperparameters. We selected the algorithm and hyperparameters that produced the most homogenous clusters, i.e., clusters mainly consisted of individuals sampled from the same source population. The homogeneity of clusters was assessed using the loss function:

$$L = \sum_{i=1}^n \sum_{j=1}^n d(I, j) \times \theta \quad (\text{S14})$$

where  $n$  is the number of sampled individuals,  $d(i, j)$  is the Euclidean distance between the  $i^{\text{th}}$  and  $j^{\text{th}}$  individual in the PCA space, and  $\theta$  is a Heaviside step function, which is one if the  $i^{\text{th}}$  and the  $j^{\text{th}}$  individual were clustered together but were sampled from different populations, and 0 otherwise.

This clustering-based approach of assigning haplogroups is imperfect as migration can possibly bias the haplogroup assignment (this is a general caveat when using mtDNA and Y chromosome haplogroups), e.g., an individual that recently migrated from  $S_1$  to  $S_2$  probably has an  $S_1$  haplogroup and not an  $S_2$ . However, in practice, we found that the low levels of simulated migrations between the source population did not bias our haplogroup assignment in admixed individuals, and the predicted frequencies of  $S_1$ ,  $S_2$ , and  $S_3$  haplogroups in the admixed population reflected the simulated admixture proportions.

Code implementing these analyses can be found at [https://github.com/LachanceLab/sex\\_biased\\_admixture](https://github.com/LachanceLab/sex_biased_admixture).

## Supplemental Results

### **Estimating sex biases from summary statistics of Micheletti et al. using a constant admixture model**

Although we did not observe sex ratios as large as those reported by Micheletti et al. or any cases of model failure when simulating constant gene flow after initial admixture (Table 2), it may have been a confounding factor in their analysis. For this reason, we estimated sex biases based on the X chromosomal and autosomal ancestry proportions reported by Micheletti et al. in Table S9<sup>1</sup> (also see Table 1) using a model that assumes constant, nonzero admixture.<sup>2</sup> This model identifies a set of constant, nonzero sex-specific contributions for each population that fit the observed X chromosomal and autosomal ancestry proportions. In general, this model yields more moderate sex ratios (Figure S1). However, often the range of possible sex ratios is wide, indicating that sex biases of various magnitudes and either female or male sex bias could explain the data. For instance, in regions with substantial amounts of unassigned ancestry (i.e., the Latin Caribbean, northern South America, central South America, and Central America), the range of possible sex ratios for European ancestry (yellow) spans a wide range, and median sex ratios are close to one, so that it is unclear whether European contributions were female- or male-biased (Figure S1). This wide range of possible sex ratios indicates that unassigned ancestry causes problems even if a model is used that assumes a more appropriate demographic scenario.

## Supplemental References

1. Micheletti, S.J., Bryc, K., Ancona Esselmann, S.G., Freyman, W.A., Moreno, M.E., Poznik, G.D., Shastri, A.J., Agee, M., Aslibekyan, S., Auton, A., et al. (2020). Genetic Consequences of the Transatlantic Slave Trade in the Americas. *Am. J. Hum. Genet.* *107*, 265–277.
2. Goldberg, A., and Rosenberg, N.A. (2015). Beyond 2/3 and 1/3: The Complex Signatures of Sex-Biased Admixture on the X Chromosome. *Genetics* *201*, 263 LP – 279.
3. Lind, J.M., Hutcheson-Dilks, H.B., Williams, S.M., Moore, J.H., Essex, M., Ruiz-Pesini, E., Wallace, D.C., Tishkoff, S.A., O'Brien, S.J., and Smith, M.W. (2007). Elevated male European and female African contributions to the genomes of African American individuals. *Hum. Genet.* *120*, 713–722.
4. Goldberg, A., Verdu, P., and Rosenberg, N.A. (2014). Autosomal Admixture Levels Are Informative About Sex Bias in Admixed Populations. *Genetics* *198*, 1209 LP – 1229.
5. Verdu, P., and Rosenberg, N.A. (2011). A general mechanistic model for admixture histories of hybrid populations. *Genetics* *189*, 1413–1426.
6. Gravel, S., Henn, B.M., Gutenkunst, R.N., Indap, A.R., Marth, G.T., Clark, A.G., Yu, F., Gibbs, R.A., and Bustamante, C.D. (2011). Demographic history and rare allele sharing among human populations. *Proc. Natl. Acad. Sci. U. S. A.* *108*, 11983–11988.
7. Browning, S.R., and Browning, B.L. (2015). Accurate Non-parametric Estimation of Recent Effective Population Size from Segments of Identity by Descent. *Am. J. Hum. Genet.* *97*, 404–418.
8. Browning, S.R., Browning, B.L., Daviglus, M.L., Durazo-Arvizu, R.A., Schneiderman, N., Kaplan, R.C., and Laurie, C.C. (2018). Ancestry-specific recent effective population size in the Americas. *PLOS Genet.* *14*, 1–22.
9. Scally, A. (2016). The mutation rate in human evolution and demographic inference. *Curr. Opin. Genet. Dev.* *41*, 36–43.
10. Haller, B.C., and Messer, P.W. (2019). SLiM 3: Forward Genetic Simulations Beyond the Wright–Fisher Model. *Mol. Biol. Evol.* *36*, 632–637.
11. Haller, B.C., Galloway, J., Kelleher, J., Messer, P.W., and Ralph, P.L. (2019). Tree-sequence recording in SLiM opens new horizons for forward-time simulation of whole genomes. *Mol. Ecol. Resour.* *19*, 552–566.
12. Kelleher, J., Etheridge, A.M., and McVean, G. (2016). Efficient Coalescent Simulation and Genealogical Analysis for Large Sample Sizes. *PLOS Comput. Biol.* *12*, 1–22.
13. Nelson, D., Kelleher, J., Ragsdale, A.P., Moreau, C., McVean, G., and Gravel, S. (2020). Accounting for long-range correlations in genome-wide simulations of large cohorts. *PLOS Genet.* *16*, 1–12.
14. Jordan, I.K., Rishishwar, L., and Conley, A.B. (2019). Native American admixture recapitulates population-specific migration and settlement of the continental United States. *PLOS Genet.* *15*, e1008225.
15. Pascoe, P. (2009). *What Comes Naturally: Miscegenation Law and the Making of Race in America*. Oxford University Press.
16. Wallenstein, P. (1994). Freedom: Personal Liberty and Private Law" Race, Marriage, and the Law of Freedom: Alabama and Virginia, 1860s-1960s. *Chic. Kent. Law Rev.* *70*, no. 371.

17. Hartman, S. V (1997). *Scenes of Subjection: Terror, Slavery, and Self-making in Nineteenth-century America*. Oxford University Press.
18. Jennings, T. (1990). "Us Colored Women Had to Go Though A Plenty": Sexual Exploitation of African-American Slave Women. *J. Womens. Hist.* 1, no. 3.
19. Pokorak, J.J. (2007). Rape as a badge of slavery: The legal history of, and remedies for, prosecutorial race-of-victim changing disparities. *Nevada Law Journal* 7, no. 1.
20. Goldberg, A., Rastogi, A., and Rosenberg, N.A. (2020). Assortative mating by population of origin in a mechanistic model of admixture. *Theor. Popul. Biol.* 134, 129–146.
21. Danecek, P., Bonfield, J.K., Liddle, J., Marshall, J., Ohan, V., Pollard, M.O., Whitwham, A., Keane, T., McCarthy, S.A., Davies, R.M., et al. (2021). Twelve years of SAMtools and BCFtools. *GigaScience*, Volume 10, Issue 2, February 2021, giab008.
22. Chang, C.C., Chow, C.C., Tellier, L.C.A.M., Vattikuti, S., Purcell, S.M., and Lee, J.J. (2015). Second-generation PLINK: rising to the challenge of larger and richer datasets. *GigaScience*, Volume 4, Issue 1, December 2015, s13742–015–0047–8,
23. Alexander, D.H., Novembre, J., and Lange, K. (2009). Fast model-based estimation of ancestry in unrelated individuals. *Genome Res.* 19, 1655–1664.
24. Weissensteiner, H., Pacher, D., Kloss-Brandstätter, A., Forer, L., Specht, G., Bandelt, H.-J., Kronenberg, F., Salas, A., and Schönherr, S. (2016). HaploGrep 2: mitochondrial haplogroup classification in the era of high-throughput sequencing. *Nucleic Acids Res.* 44, W58-63.
25. Poznik, G.D. (2016). Identifying Y-chromosome haplogroups in arbitrarily large samples of sequenced or genotyped men. *BioRxiv* 88716. doi: <https://doi.org/10.1101/088716>
26. Pedregosa, F., Varoquaux, G., Gramfort, A., Michel, V., Thirion, B., Grisel, O., Blondel, M., Prettenhofer, P., Weiss, R., Dubourg, V., et al. (2011). Scikit-learn: Machine Learning in Python. *J. Mach. Learn. Res.* 12, 2825–2830.
